# Supplementary material
Source: Royal Society of Chemistry journal article supplement (doi:10.1039/d6np00006a)
Supplement: d6np00006a1.pdf [file d6np00006a1.pdf]

# Supporting Information

## **High-Throughput Assays for SAM-Dependent Methyltransferases: Advances, Challenges, and Future Perspectives**

Renia Fotiadou,<sup>a</sup> Florian Heinz,<sup>b</sup> Konstantin Weigmann,<sup>b</sup> Mark Doerr,<sup>b</sup> Uwe T. Bornscheuer<sup>\*b</sup>  
and Ioannis V. Pavlidis<sup>\*a</sup>

<sup>a</sup> Department of Chemistry, University of Crete, Voutes University Campus, 70013 Heraklion, Greece

E-mail: ipavlidis@uoc.gr

<sup>b</sup> Department of Biotechnology & Enzyme Catalysis, Institute of Biochemistry, University of Greifswald, Felix-Hausdorff-Str. 4, D-17487 Greifswald, Germany

E-mail: uwe.bornscheuer@uni-greifswald.de

| Assay Principle                                             | Detected Compound   | Method                             | Enzyme Preparation              | Detection Limit/Range                   | Comments                                                                                                   | Reference |
|-------------------------------------------------------------|---------------------|------------------------------------|---------------------------------|-----------------------------------------|------------------------------------------------------------------------------------------------------------|-----------|
| L-Homocysteine release from S-ribosylhomocysteine by lyase  | L-homocysteine      | Colorimetric Assay<br>412 nm       | Purified Enzyme                 | 4 $\mu$ M SAH<br>5 to 200 $\mu$ M SAH   | Non-continuous assay                                                                                       | [1]       |
| L-Homocysteine release from SAH by hydrolase                | L-homocysteine      | Colorimetric Assay<br>412 nm       | Purified Enzyme                 | 0.4 $\mu$ M SAH<br>4 to 250 $\mu$ M SAH | Non-continuous assay,<br>1h incubation with DTNB                                                           | [2]       |
| Adenine release by SAH nucleosidase followed by deamination | Hypoxanthine        | Spectrophotometric Assay<br>265 nm | Purified Enzyme                 | 35 $\mu$ M SAH<br>below 250 $\mu$ M     | Susceptible to background interference at 265 nm                                                           | [3]       |
| Release of ammonia coupled with NAD(P) oxidation            | NAD(P) <sup>+</sup> | Spectrophotometric Assay<br>340 nm | Purified Enzyme                 | 170 nM SAH<br>n.m.                      | Increased sensitivity by coupling with NAD(P)H oxidation, three additional enzymes necessary for the assay | [4]       |
| Release of ammonia coupled with NAD(P) oxidation            | NAD(P) <sup>+</sup> | Spectrophotometric Assay<br>340 nm | Purified Enzyme                 | n.m.<br>up to 100 $\mu$ M SAH           | Reducing complexity by replacing SAH nucleosidase and adenine deaminase with SAH deaminase                 | [5]       |
| Oxidation of TMB by chloroperoxidase oxidized iodide (HOI)  | Iodide              | Colorimetric Assay<br>570 nm       | Purified Enzyme<br>Crude lysate | n.m.<br>5 to 400 $\mu$ M Iodide         | Insensitive to chloride, compatible with crude lysate, halide methyltransferases only                      | [6]       |
| Peroxidase-mimicking Ag/Pt nanocluster                      | Methylated DNA      | Colorimetric Assay<br>652 nm       | Purified Enzyme                 | 0.05 U/ml<br>0.5 to 10 U/ml             | DNA methyltransferases only                                                                                | [7]       |

|                                                                                            |                               |                                      |                                                           |                                                                                             |                                                                                                                                                               |      |
|--------------------------------------------------------------------------------------------|-------------------------------|--------------------------------------|-----------------------------------------------------------|---------------------------------------------------------------------------------------------|---------------------------------------------------------------------------------------------------------------------------------------------------------------|------|
| Peroxidase-mimicking Ag/Pt nanoparticles                                                   | Methylated DNA                | Colorimetric Assay<br>652 nm         | Purified Enzyme                                           | 0.04 U/ml<br>0.2 to 2 U/ml                                                                  | DNA methyltransferases only                                                                                                                                   | [8]  |
| Methylation of quinoline                                                                   | 1-methylquinoline (1-MQ)      | Fluorescence Assay<br>330/405 nm     | Purified Enzyme                                           | 40 nM 1-MQ<br>1 to 25 $\mu$ M 1-MQ                                                          | Substrate specific fluorescence (1-MQ)                                                                                                                        | [9]  |
| Oxidation of adenine by xanthine oxidase                                                   | H <sub>2</sub> O <sub>2</sub> | Fluorescence Assay<br>530/590 nm     | Purified Enzyme                                           | < 1 $\mu$ M H <sub>2</sub> O <sub>2</sub><br>up to 20 $\mu$ M H <sub>2</sub> O <sub>2</sub> | Further experimentation necessary to assess feasibility for kinetic measurements (xanthine oxidase probably provides insufficient coupling activity)          | [10] |
| SAH-sensing FRET riboswitch assay                                                          | SAH                           | Fluorescence Assay                   | Purified Enzyme                                           | < 10 nM SAH<br>n.m.                                                                         | Suitable for accurate determination of IC <sub>50</sub> values of inhibitors                                                                                  | [11] |
| SAH-sensing FRET RNA aptamer assay                                                         | SAH                           | Fluorescence Assay<br>485/600 nm     | Purified Enzyme                                           | < 18 nM SAH<br>n.m.                                                                         | Microscale thermophoresis-based assay requiring only 10 $\mu$ L sample, 300-fold higher selectivity for SAH than SAM                                          | [12] |
| Release of SH <sub>2</sub> from L-homocysteine by lyase                                    | SH <sub>2</sub>               | Fluorescence Assay<br>365/450 nm     | Purified Enzyme<br>Crude lysate                           | < 1 $\mu$ M SAH<br>up to 60 $\mu$ M SAH                                                     | Compatible with crude lysate                                                                                                                                  | [13] |
| SAH hydrolase releasing L-homocysteine                                                     | L-homocysteine                | Fluorescence Assay<br>340/450 nm     | Purified Enzyme                                           | n.m.                                                                                        | Miniaturized to 1536-well format                                                                                                                              | [14] |
| Ratiometric fluorescence signal of pyranine due to changes in H <sup>+</sup> concentration | H <sup>+</sup>                | Fluorescence Assay<br>405&450/510 nm | Purified Enzyme<br>Crude lysate<br>Pre-treated whole cell | ~4–12 $\mu$ M LOD<br>up to 600 $\mu$ M c(H <sup>+</sup> )                                   | Enzyme-uncoupled, continuous, high-throughput, susceptible to background proton fluctuations, high dependence on solution pH and pK <sub>a</sub> of compounds | [15] |

|                                                                                  |                        |                       |                                 |                                                 |                                                                                                  |      |
|----------------------------------------------------------------------------------|------------------------|-----------------------|---------------------------------|-------------------------------------------------|--------------------------------------------------------------------------------------------------|------|
| Stepwise transformation of SAH to ATP via adenine and AMP                        | ATP                    | Bioluminescence Assay | Purified Enzyme                 | 60 nM SAH<br>0.06 to 40 $\mu$ M SAH             | Suitable for endpoint and continuous measurement                                                 | [16] |
| Degradation of SAH to AMP under the consumption of ATP                           | ATP                    | Bioluminescence Assay | Purified Enzyme                 | n.m.<br>10 to 100 nM ATP                        | Assay volume of 10 $\mu$ L,<br>decreasing signal corresponds to higher MT activity               | [17] |
| Two stage stepwise conversion of SAH to ADP, which is then phosphorylated to ATP | ATP                    | Bioluminescence Assay | Purified Enzyme                 | 20 to 30 nM SAH                                 | Non-continuous assay,<br>one-step assay reaction using both reagents is possible                 | [18] |
| Transformation of SAH to ATP via MTaseGlo or hydrolysis of SAH to L-homocysteine | ATP and L-homocysteine | Bioluminescence Assay | Purified Enzyme                 | n.m.                                            | Miniaturized to 1536-well format                                                                 | [14] |
| <i>In vivo</i> conversion of SAH to L-homocysteine triggering GFPuV              | GFPuV                  | Biosensor             | Whole cell application          | < 1 $\mu$ M<br>up to 100 $\mu$ M L-homocysteine | High-throughput <i>in vivo</i> screening                                                         | [19] |
| Detection of SAH via mass spectrometry                                           | SAH                    | LC-MS                 | Purified Enzyme<br>Crude lysate | 50 nM SAH<br>0.05 to 1.6 $\mu$ M SAH            | No reaction workup besides quenching with formic acid and centrifugation,<br>not high-throughput | [20] |

n.m. - not mentioned

## References

- [1] C. L. Hendricks, J. R. Ross, E. Pichersky, J. P. Noel, and Z. S. Zhou, "An enzyme-coupled colorimetric assay for S-adenosylmethionine-dependent methyltransferases", *Analytical Biochemistry*, vol. 326, no. 1, pp. 100–105, Mar. 2004, doi: 10.1016/j.ab.2003.11.014.
- [2] T. F. Schäberle, C. Siba, T. Höver, and G. M. König, "An easy-to-perform photometric assay for methyltransferase activity measurements", *Analytical Biochemistry*, vol. 432, no. 1, pp. 38–40, Jan. 2013, doi: 10.1016/j.ab.2012.09.026.
- [3] K. M. Dorgan, W. L. Wooderchak, D. P. Wynn, E. Karschner, J. F. Alfaro, Y. Cui, Z. S. Zhou and J. M. Hevel, "An enzyme-coupled continuous spectrophotometric assay for S-adenosylmethionine-dependent methyltransferases", *Analytical Biochemistry*, vol. 350, no. 2, pp. 249–255, Mar. 2006, doi: 10.1016/j.ab.2006.01.004.
- [4] S. Duchin, Z. Vershinin, D. Levy, and A. Aharoni, "A continuous kinetic assay for protein and DNA methyltransferase enzymatic activities", *Epigenetics & Chromatin*, vol. 8, no. 1, p. 56, Dec. 2015, doi: 10.1186/s13072-015-0048-y.
- [5] H. Simon-Baram, S. Roth, C. Niedermayer, P. Huber, M. Speck, J. Diener, M. Richter and S. Bershtein, "A high-throughput continuous spectroscopic assay to measure the activity of natural product methyltransferases," *ChemBioChem*, vol. 23, no. 17, p. e202200162, Sep. 2022, doi: 10.1002/cbic.202200162.
- [6] Q. Tang, C. W. Grathwol, A. S. Aslan-Üzel, S. Wu, A. Link, I. V. Pavlidis, C. P. S. Badenhorst and U. T. Bornscheuer, "Directed evolution of a halide methyltransferase enables biocatalytic synthesis of diverse SAM analogs," *Angewandte Chemie International Edition*, vol. 60, no. 3, pp. 1524–1527, Jan. 2021, doi: 10.1002/anie.202013871.
- [7] H. A. Kermani, M. Hosseini, A. Miti, M. Dadmehr, G. Zuccheri, S. Hosseinkhani and M. R. Ganjali, "A colorimetric assay of DNA methyltransferase activity based on peroxidase mimicking of DNA template Ag/Pt bimetallic nanoclusters," *Analytical and Bioanalytical Chemistry*, vol. 410, no. 20, pp. 4943–4952, Aug. 2018, doi: 10.1007/s00216-018-1143-2.
- [8] C. Wang, L. Jiang, Y. Zaho, L. Cheng, L. Zhou, A. Liu and L. Xu, "Ultrasensitive colorimetric sensing of DNA methyltransferase activity based on signal amplification by modulating cascade reaction," *Sensors and Actuators B: Chemical*, vol. 429, p. 137298, Apr. 2025, doi: 10.1016/j.snb.2025.137298.
- [9] H. Neelakantan, V. Vance, H.-Y. L. Wang, S. F. McHardy, and S. J. Watowich, "Noncoupled fluorescent assay for direct real-time monitoring of nicotinamide N -methyltransferase activity," *Biochemistry*, vol. 56, no. 6, pp. 824–832, Feb. 2017, doi: 10.1021/acs.biochem.6b01215.
- [10] M. K. Akhtar, D. Vijay, S. Umbreen, C. J. McLean, Y. Cai, D. J. Campopiano and G. J. Loake, "Hydrogen peroxide-based fluorometric assay for real-time monitoring of SAM-dependent methyltransferases," *Frontiers in Bioengineering and Biotechnology*, vol. 6, p. 146, Oct. 2018, doi: 10.3389/fbioe.2018.00146.
- [11] H. Pham, M. Kumar, A. R. Martinez, M. Ali, and R. G. Lowery, "Development and validation of a generic methyltransferase enzymatic assay based on an SAH riboswitch," *SLAS Discovery*, vol. 29, no. 4, p. 100161, Jun. 2024, doi: 10.1016/j.slasd.2024.100161.
- [12] Z. Nidoieva, M. O. Sabin, T. Dewald, A. C. Weldert, S. N. Hoba, M. Helm and F. Barthels, "A microscale thermophoresis-based enzymatic RNA methyltransferase assay enables the discovery of DNMT2 inhibitors," *Communications Chemistry*, vol. 8, no. 1, p. 32, Feb. 2025, doi: 10.1038/s42004-025-01439-9.
- [13] M. J. Menke, P. Schneider, C. P. S. Badenhorst, A. Kunzendorf, F. Heinz, M. Dörr, M. A. Hayes and U. T. Bornscheuer, "A universal, continuous assay for SAM-dependent methyltransferases," *Angewandte Chemie International Edition*, vol. 62, no. 51, p. e202313912, Dec. 2023, doi: 10.1002/anie.202313912.
- [14] G. Dong, A. Yasgar, D. L. Peterson, A. Zakharov, D. Talley, K. C. Cheng, A. Jadhav, A. Simeonov and R. Huang, "Optimization of high-throughput methyltransferase assays for

- the discovery of small molecule inhibitors,” *ACS Combinatorial Science*, vol. 22, no. 8, pp. 422–432, Aug. 2020, doi: 10.1021/acscombsci.0c00077.
- [15] B. P. Chapple, L. M. Böhmer and J. Pietruszka, “Development of a continuous, uncoupled fluorescence-based assay for monitoring methyltransferase activity: Methylation going sour,” *ChemCatChem*, vol. 18, no. 3, p. e01714, Jan. 2026. doi: 10.1002/cctc.202501714
- [16] G. Ibáñez, J. L. McBean, Y. M. Astudillo, and M. Luo, “An enzyme-coupled ultrasensitive luminescence assay for protein methyltransferases,” *Analytical Biochemistry*, vol. 401, no. 2, pp. 203–210, Jun. 2010, doi: 10.1016/j.ab.2010.03.010.
- [17] K. M. Drake, V. G. Watson, A. Kisielewski, R. Glynn, and A. D. Napper, “A sensitive luminescent assay for the histone methyltransferase NSD1 and other SAM-dependent enzymes,” *Assay and Drug Development Technologies*, vol. 12, no. 5, pp. 258–271, Jun. 2014, doi: 10.1089/adt.2014.583.
- [18] K. Hsiao, H. Zegzouti, and S. A. Goueli, “Methyltransferase-Glo: A universal, bioluminescent and homogenous assay for monitoring all classes of methyltransferases,” *Epigenomics*, vol. 8, no. 3, pp. 321–339, Mar. 2016, doi: 10.2217/epi.15.113.
- [19] Z. Zhen, L. Xiang, S. Li, H. Li, Y. Lei, W. Chen, J. M. Jin, C. Liang and S. Y. Tang, “Designing a whole-cell biosensor applicable for S-adenosyl-L-methionine-dependent methyltransferases,” *Biosensors and Bioelectronics*, vol. 268, p. 116904, Jan. 2025, doi: 10.1016/j.bios.2024.116904.
- [20] M. E. K. Salyan, D. L. Pedicord, L. Bergeron, G. A. Mintier, L. Hunihan, K. Kuit, L. A. Balanda, B. J. Robertson, J. N. Feder, R. Westphal, P. A. Shipkova and Y. Blat, “A general liquid chromatography/mass spectroscopy-based assay for detection and quantitation of methyltransferase activity,” *Analytical Biochemistry*, vol. 349, no. 1, pp. 112–117, Feb. 2006, doi: 10.1016/j.ab.2005.10.040.
